# Supplementary material for: Single cell transcriptional and chromatin accessibility profiling redefine cellular heterogeneity in the adult human kidney
Source: PubMed Central journal article supplement (PMC8044133; doi:10.1038/s41467-021-22368-w), 2021-04-13
Supplement: 41467_2021_22368_MOESM1_ESM.pdf [file 41467_2021_22368_MOESM1_ESM.pdf]

## **Supplementary Information**

### **Single cell transcriptional and chromatin accessibility profiling redefine cellular heterogeneity in the adult human kidney**

Yoshiharu Muto, Parker C. Wilson, Nicolas Ledru, Haojia Wu, Henrik Dimke, Sushrut S. Waikar and Benjamin D. Humphreys

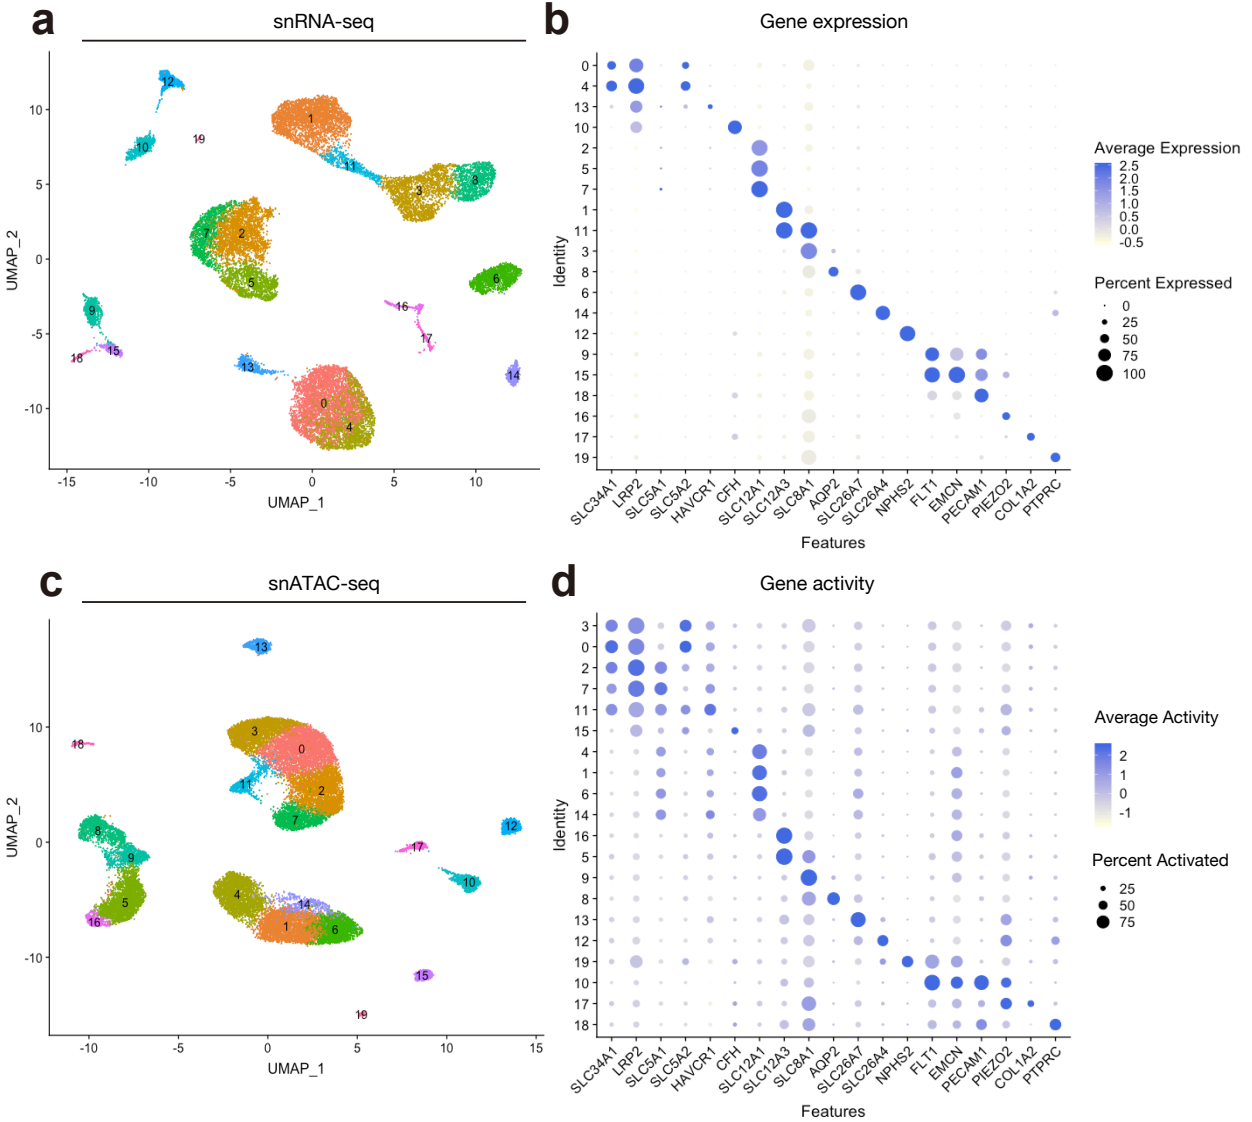

**Supplementary Figure 1 – Unsupervised clustering of snRNA-seq and snATAC-seq human kidney datasets:** (a) Unsupervised clustering of snRNA-seq dataset in Seurat, and (b) the dot plots showing marker gene expressions of each cell types. The diameter of the dot corresponds to the proportion of cells expressing the indicated gene and the density of the dot corresponds to average expression relative to all cell types. (c) Unsupervised clustering of snATAC-seq dataset in Signac, and (d) the dot plots showing marker gene activities of each cell types. The diameter of the dot corresponds to the proportion of cells with detected activity of indicated gene and the density of the dot corresponds to average gene activity relative to all cell types.

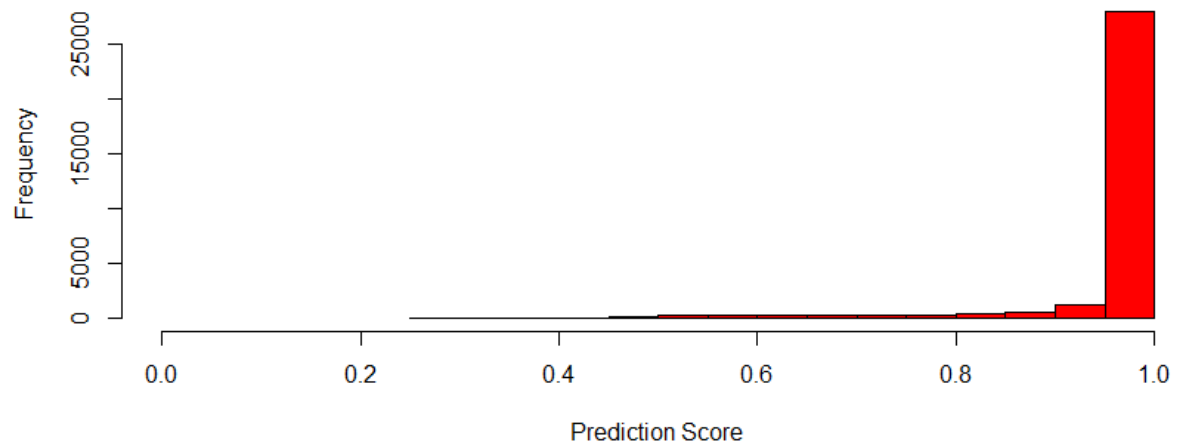

**Supplementary Figure 2 – Label transfer of annotated snRNA-seq confidently predicts snATAC-seq cell types:** Distribution of maximum prediction scores of nuclei calculated by the label transfer algorithm in Signac package. A gene activity matrix was created from the snATAC-seq data and transfer anchors were identified between the ‘reference’ snRNA-seq dataset and ‘query’ gene activity matrix followed by assignment of predicted cell types using the Signac package.

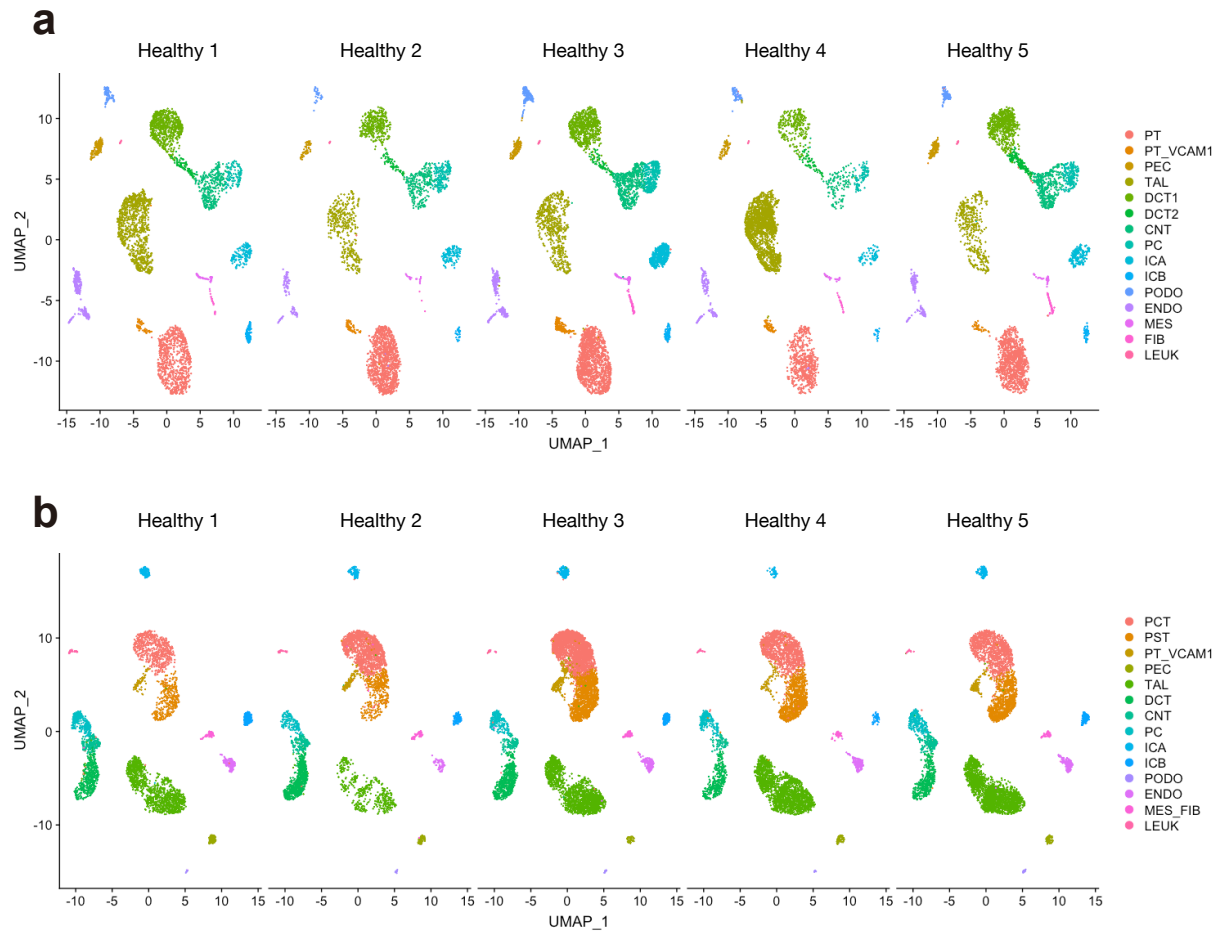

**Supplementary Figure 3 – All cell types detected are found in each kidney sample in both modalities: (a) UMAP visualization of snRNA-seq dataset per kidney sample. (b) UMAP visualization of snATAC-seq dataset per kidney sample.**

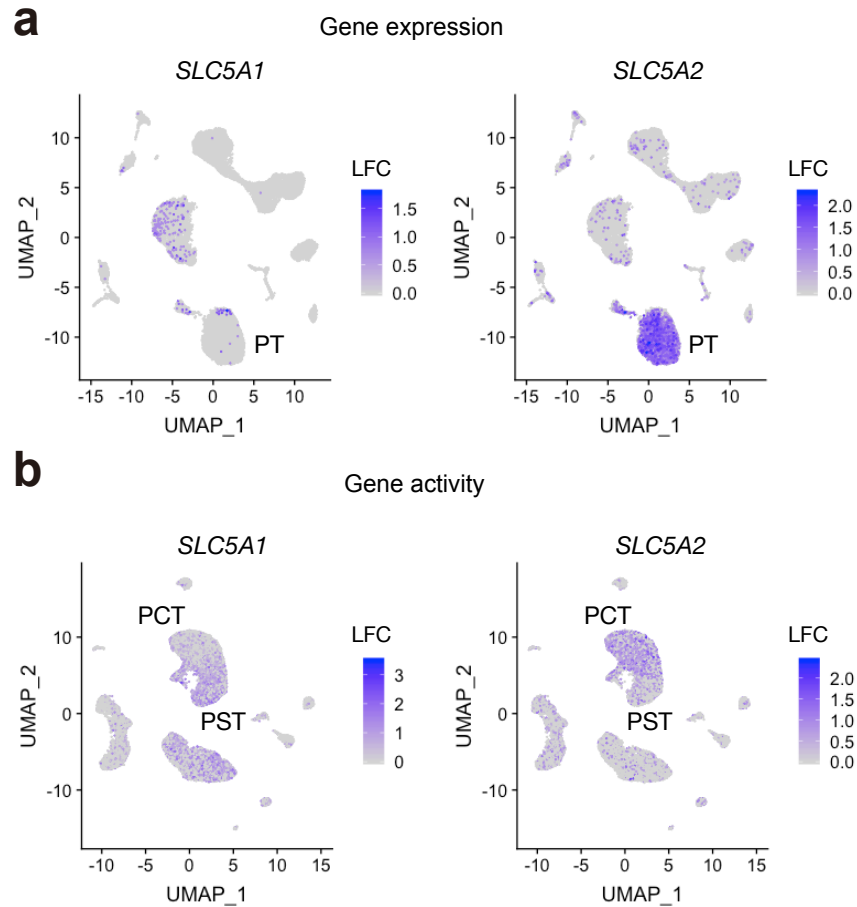

**Supplementary Figure 4 – *SLC5A1* and *SLC5A2* gene activity delineate proximal tubule segments:** (a) snRNA-seq does not detect *SLC5A1* expression, and *SLC5A2* expression does not clearly distinguish subpopulations of proximal tubule. (b) snATAC-seq shows increased *SLC5A1* gene activity in a subpopulation of proximal tubule (PST) that is mutually exclusive to the subpopulation (PCT) showing increased *SLC5A2* gene activity. The color scale for each plot represents a normalized log-fold-change (LFC).

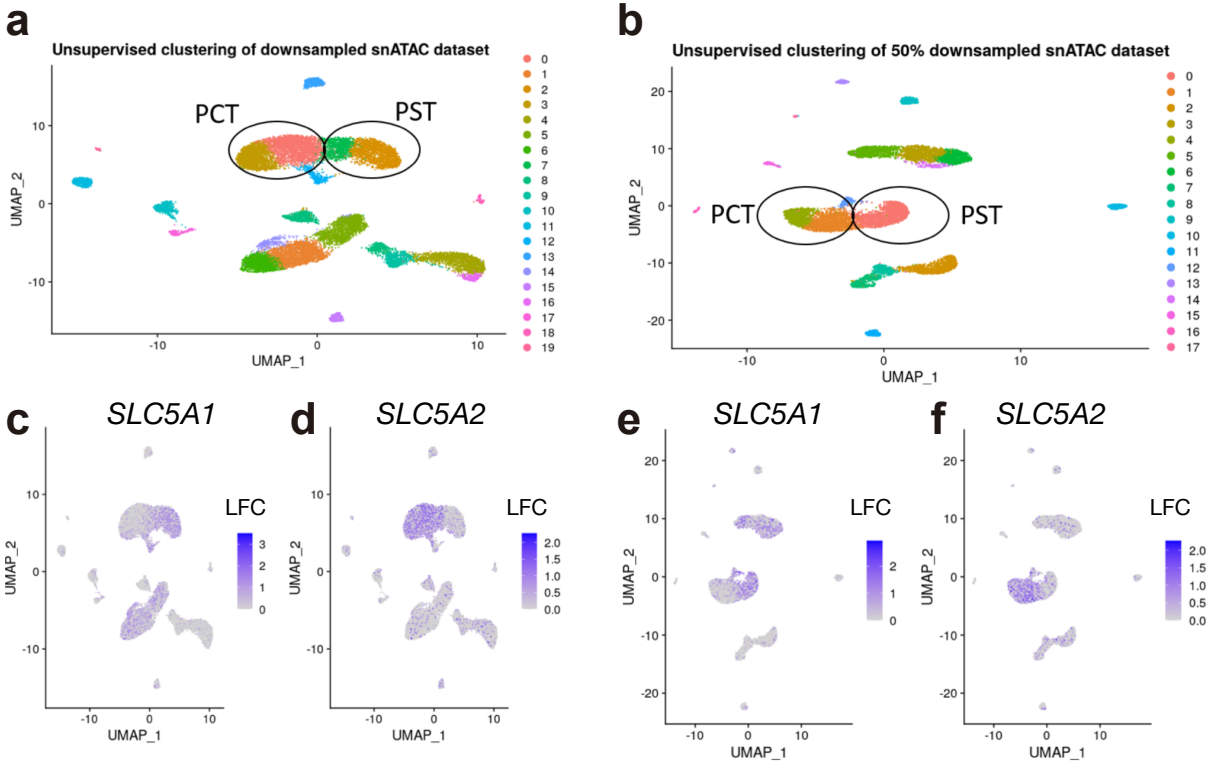

**Supplementary Figure 5 – *SLC5A1* and *SLC5A2* gene activity delineate proximal tubule segments after downsampling:** Resolving the difference between the proximal convoluted tubule (PCT, high *SLC5A2* expression) and proximal straight tubule (PST, high *SLC5A1* expression) subclusters in the snATAC-seq dataset after downsampling to the same number of cells as the snRNA dataset (19,985 cells, **a**) and 50% of the cells in the snRNA dataset (9,992 cells, **b**). A umap plot displaying *SLC5A1* or *SLC5A2* gene activity in each downsampled dataset are also shown (**c-f**). The color scale for each plot represents a normalized log-fold-change (LFC).

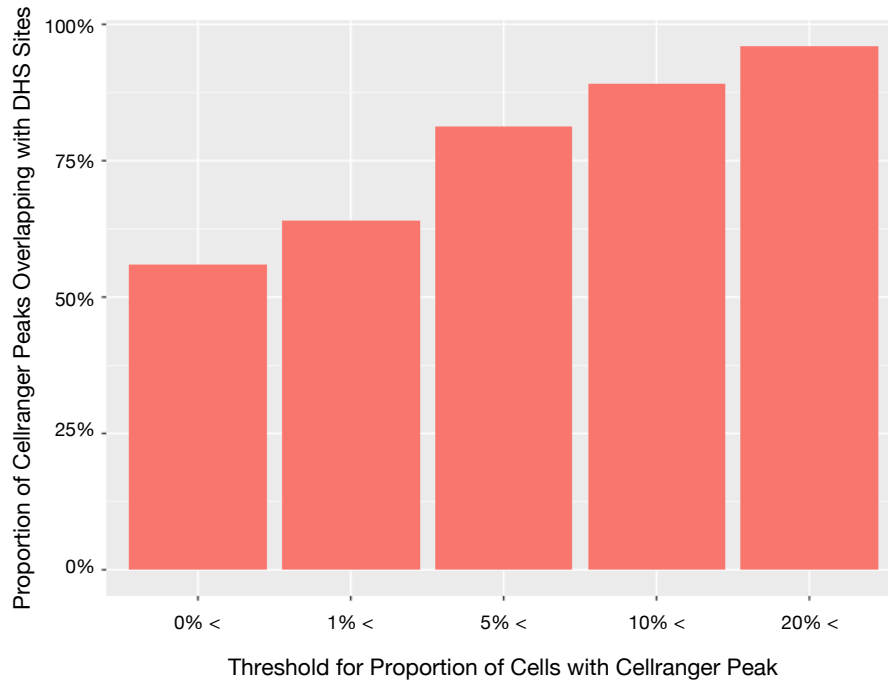

**Supplementary Figure 6 – Aggregated Cell Ranger peaks significantly overlap with previously-published DNase hypersensitive sites:** Cell Ranger peaks were filtered for peaks contained in a designated proportion of cells (x-axis). DNase hypersensitive sites (DHS) were downloaded from Sieber et al. (PMID: 30760496) and overlapped with the Cell Ranger peaks using the GenomicRanges package. The proportion of overlap between DHS and Cell Ranger peaks increased as Cell Ranger peaks were filtered for peaks present in an increasing proportion of cells.

**a**

Relative distance to TSS in all cell-types

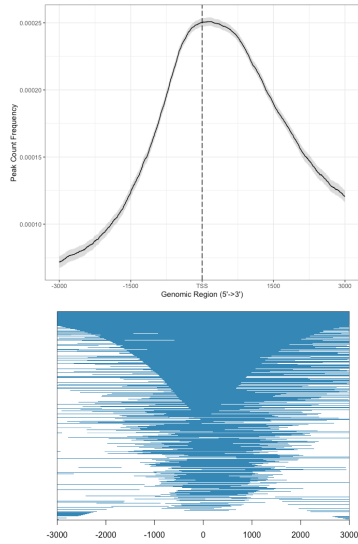**b**

Relative distance to TSS in each cell-types

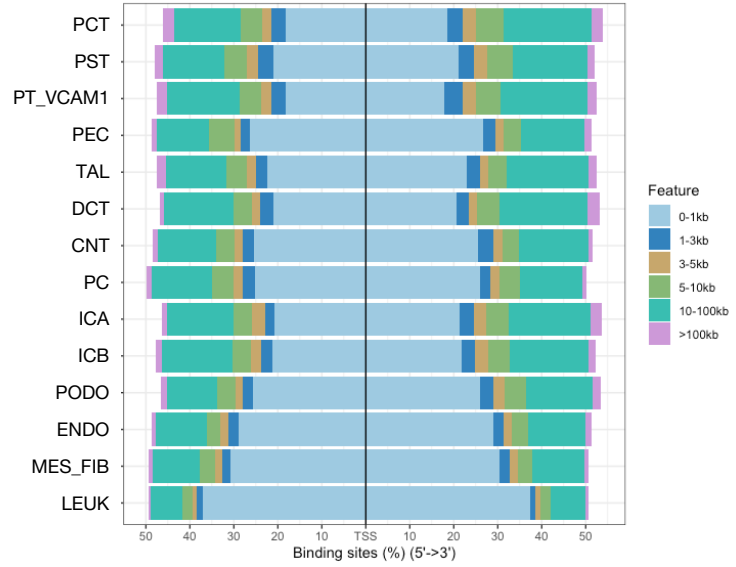

**Supplementary Figure 7 – Cell type-specific DAR are enriched around the transcription start sites (TSS): (a) Relative distance of differentially accessible region (DAR) to TSS in all the dataset. (b) Relative distance of DAR to TSS in each cell type.**



**a**

- Promoter or first exon
- Open chromatin region co-accessible with the promoter
- Background control

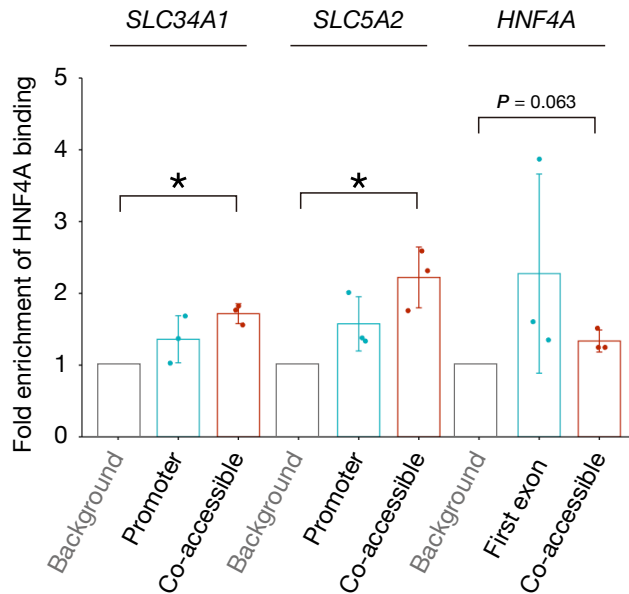

| Target                       | Coordinates              |
|------------------------------|--------------------------|
| Background control           | chr5:177393216-177393337 |
| <i>SLC34A1</i> promoter      | chr5:177384377-177384389 |
| <i>SLC34A1</i> co-accessible | chr5:177379077-177379089 |
| <i>SLC5A2</i> promoter       | chr16:31482945-31482957  |
| <i>SLC5A2</i> co-accessible  | chr16:31458141-31458153  |
| <i>HNF4A</i> first exon      | chr20:44401447-44401459  |
| <i>HNF4A</i> co-accessible   | chr20:44395660-44395672  |

**b**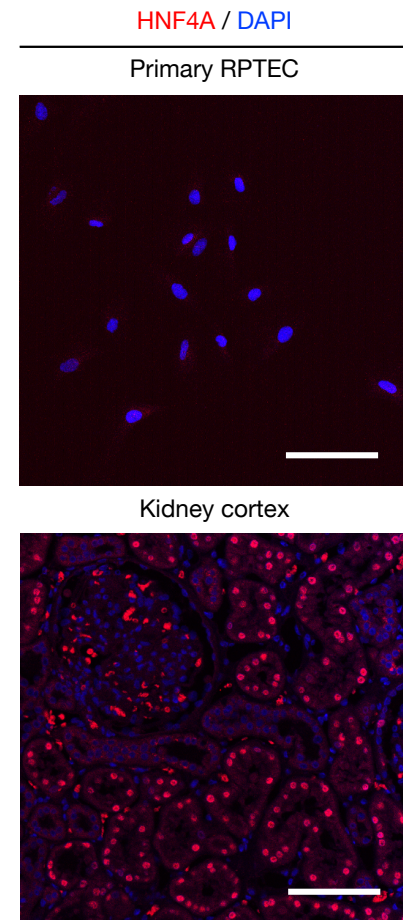

**Supplementary Figure 8 – HNF4A binds the predicted HNF4A motifs within DAR for selected target gene loci in RPTEC:** (a) ChIP followed by quantitative PCR (ChIP-qPCR) analysis of HNF4A binding within the promoter, first exon or the open chromatin regions that were predicted to interact with promoters via a CCAN in the differentially expressed gene loci (*SLC34A1*, *SLC5A2* and *HNF4A*) in RPTEC (n = 3 independent samples). ChIP-qPCR was performed with an open chromatin region without HNF4A motif on the intronic region of *SLC34A1* gene as a background control. Data are mean±s.d. \*P<0.05 (P = 0.0122, 0.0378, two-sided one sample t-test). The table shows the ChIP-qPCR target regions and their coordinates. (b) Representative immunostaining images of HNF4A (red) in the kidney cortex or primary RPTEC in the primary RPTEC. Scale bar indicates 100 μm. Two independent experiments were performed, and similar results were obtained.

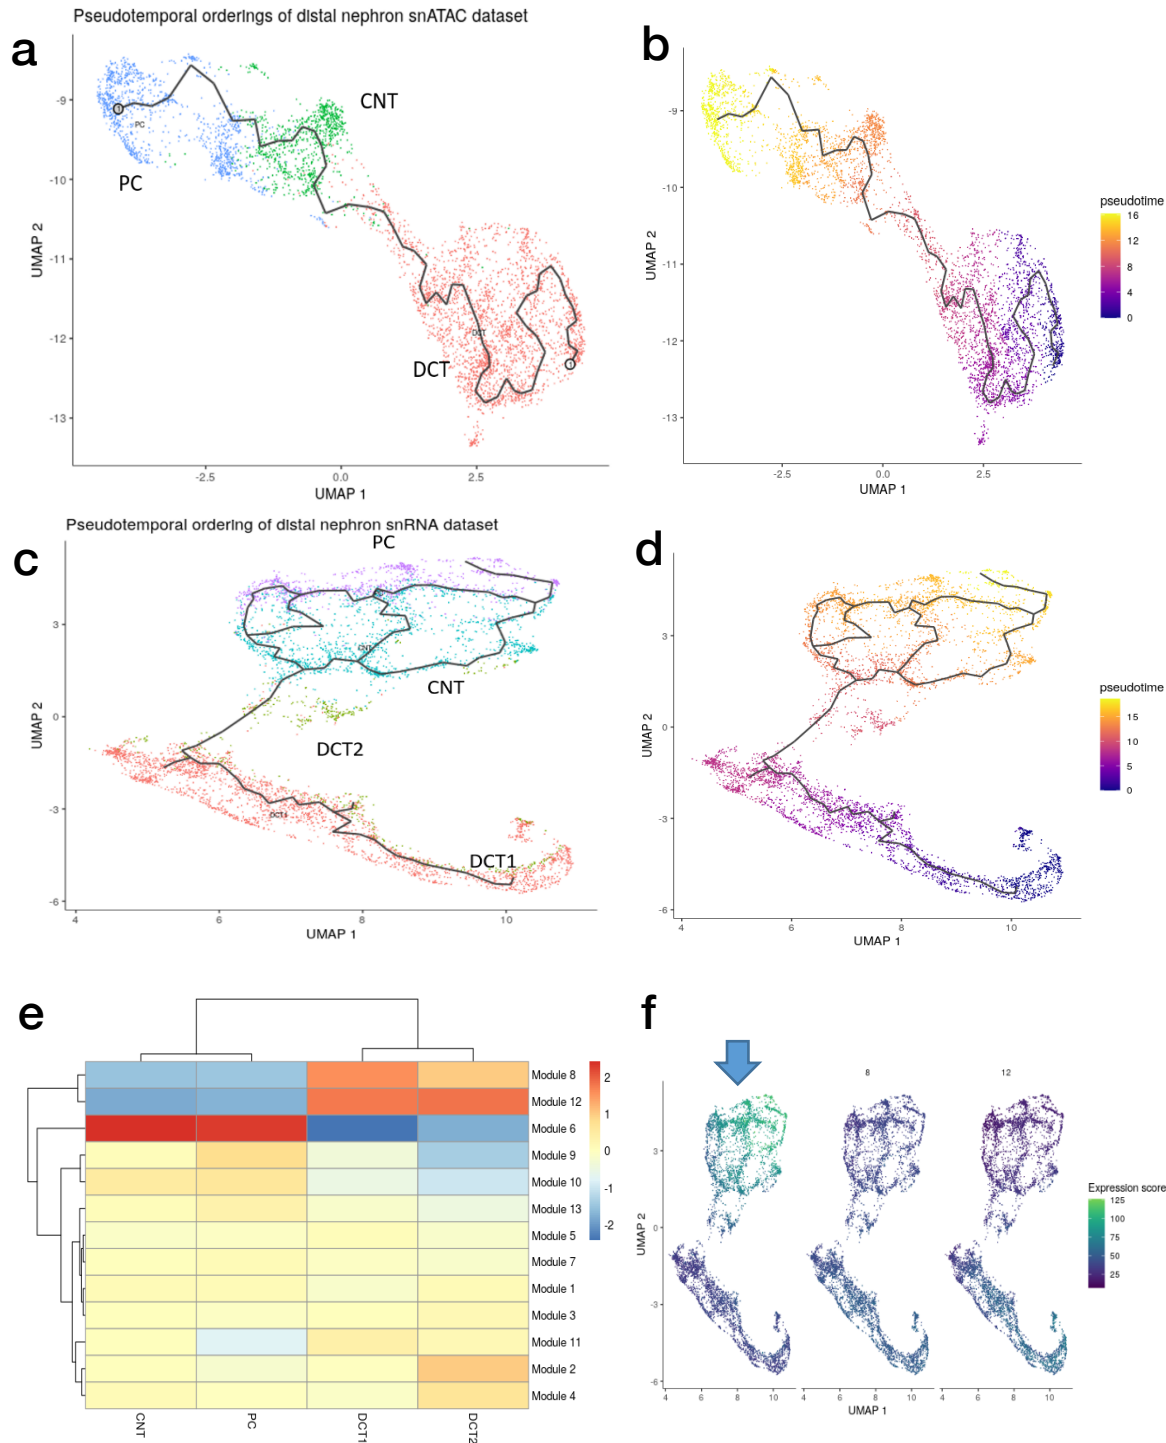

**Supplementary Figure 9 - Pseudotime-dependent gene modules that are significantly up- or down-regulated in the distal nephron progressing from proximal to distal. (a,b)** Pseudotemporal ordering of distal nephron cells in snATAC-seq data. **(c,d)** Pseudotemporal ordering of distal nephron cells in snRNA-seq data. **(e)** Gene modules associated with pseudotemporal ordering of the snRNA dataset. **(f)** Module 6,8 and 12 were visualized where they lay along the pseudotemporal trajectory. Module 6 showed the highest activity in PC and CNT among all gene modules.

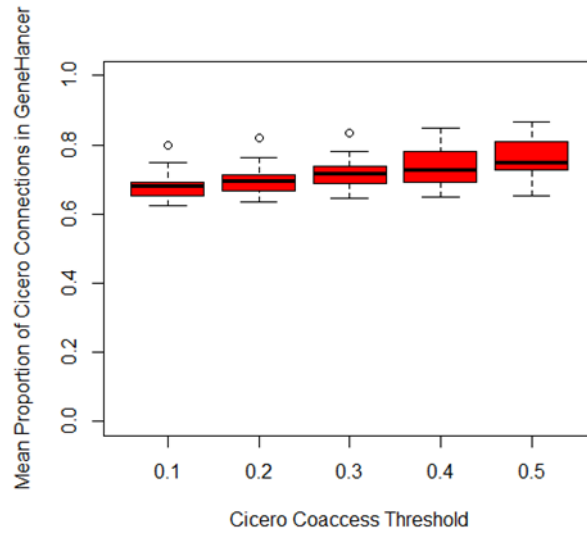

**Supplementary Figure 10 – Cicero connections significantly overlap with the GeneHancer interaction database:** The snATAC-seq dataset was partitioned into individual cell types and cell-type-specific cis-coaccessibility networks (CCAN) were identified with the R package Cicero. Cicero connections within 50kb of a cell-type-specific differentially accessible region (DAR) were compared to GeneHancer ‘double elite’ interactions downloaded from the UCSC table browser for varying Cicero coaccessibility thresholds, and the percentage of overlapped interactions are shown. Box-and-whisker plots depict the median, quartiles and range.

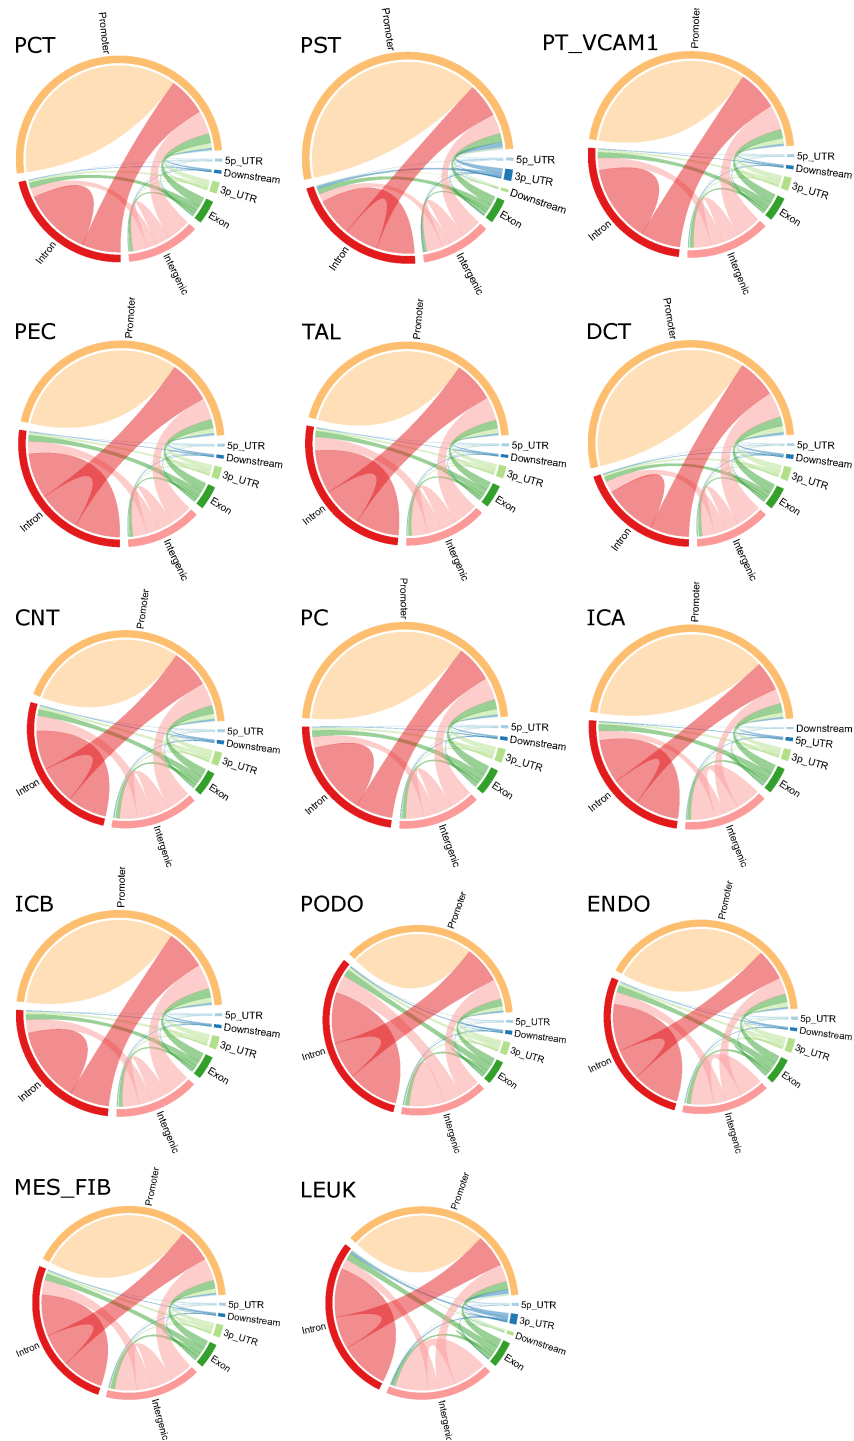

**Supplementary Figure 11 – Annotation of Cicero Connections:** The snATAC-seq dataset was partitioned into individual cell types and cis-coaccessibility networks were predicted with Cicero. The Cicero connection endpoints with a coaccessibility threshold  $> 0.2$  were annotated with ChIPSeeker using the UCSC database. The relative number of connections within and between the designated genomic regions is displayed for each cell type. Promoter - region within 3kb of the transcriptional start site. 3p\_UTR- 3' untranslated region, 5p\_UTR- 5' untranslated region, Downstream - 3kb downstream of the 3' UTR.



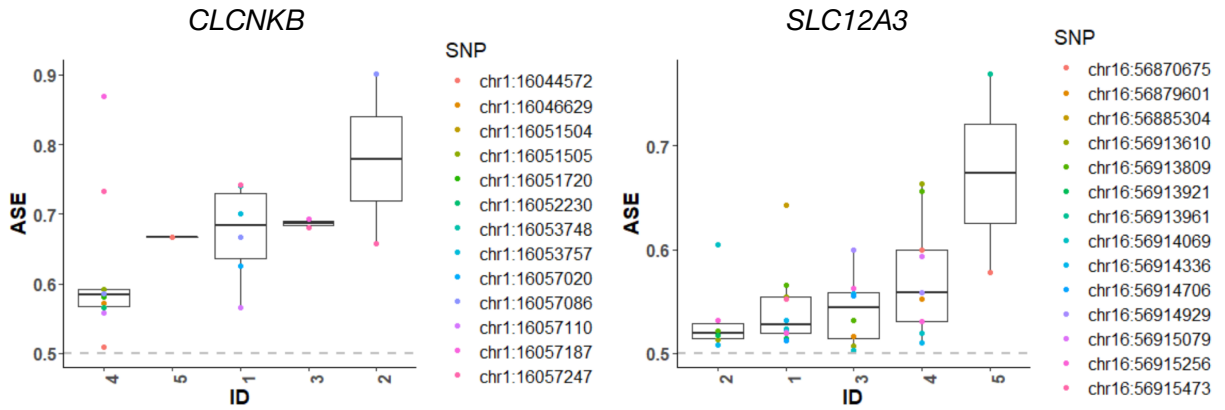

**Supplementary Figure 13 - Allele-specific expression of *CLCNKB* and *SLC12A3* among all cell types in the snRNA dataset:** Estimated SNV-level allele-specific expression (ASE) for each variant and donor in *CLCNKB* (left) or *SLC12A3* (right) gene. ASE level was estimated as major allelic fraction after haplotype pseudo-phasing. Box-and-whisker plots depict the median, quartiles and range.

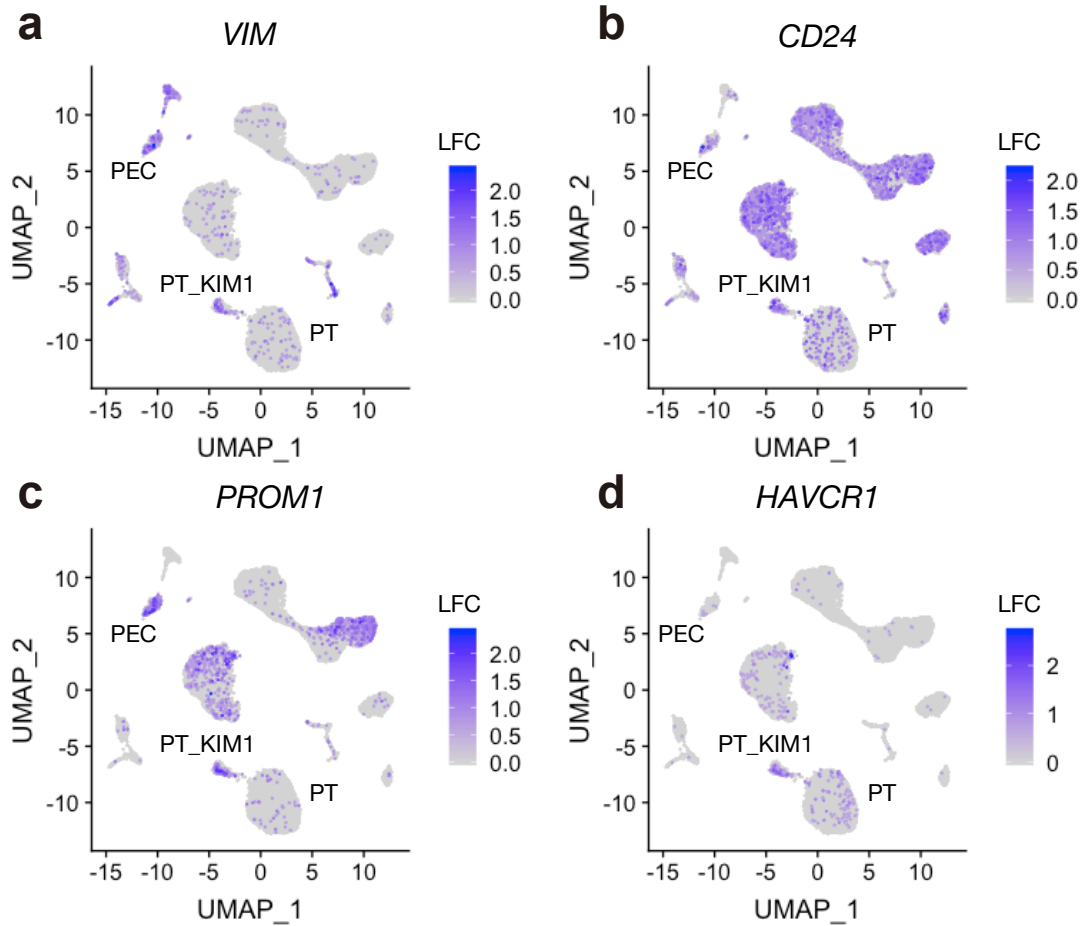

**Supplementary Figure 14 – Marker gene expressions in the PT\_VCAM1 population:** (a) *VIM* (Vimentin) (b) *CD24*, (c) *PROM1* (CD133) and (d) *HAVCR1* expression in the snRNA-seq dataset shows increased expression of these genes in the PT\_VCAM1 population compared to PT. The color scale for each plot represents a normalized log-fold-change (LFC).

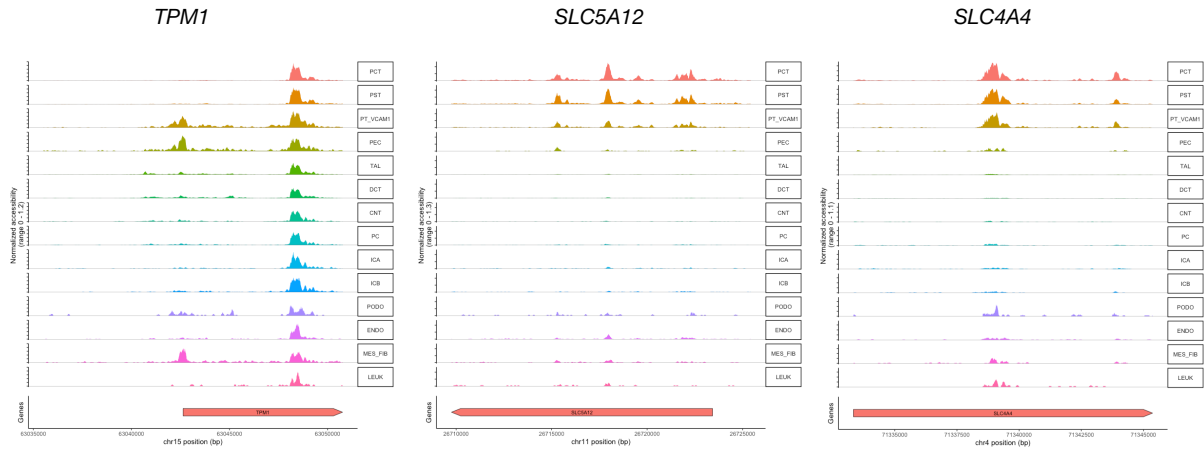

**Supplementary Figure 15 – Fragment coverage around representative DAR of *PT\_VCAM1*:** Fragment coverage (frequency of Tn5 insertion) around the representative DAR (DAR +/-5000 bp) on *TPM1*, *SLC5A12* or *SLC4A4* locus shown in Fig.6C.



**a**

| Hallmark gene set enriched in PT_VCAM1 | NES  | <i>P</i> -val | FDR- <i>q</i> |
|----------------------------------------|------|---------------|---------------|
| <b>TNFA_SIGNALING_VIA_NFKB</b>         | 2.01 | 0.000         | 0.011         |
| INTERFERON_GAMMA_RESPONSE              | 1.84 | 0.002         | 0.070         |
| HYPOXIA                                | 1.79 | 0.003         | 0.112         |
| UV_RESPONSE_DN                         | 1.77 | 0.002         | 0.127         |
| EPITHELIAL_MESENCHYMAL_TRANSITION      | 1.76 | 0.003         | 0.148         |

**b**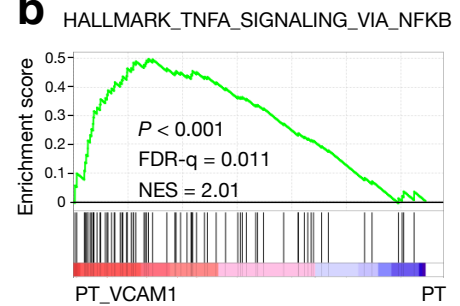

**Supplementary Figure 16 – Gene set enrichment analysis on the differentially expressed genes in PT\_VCAM1 vs PT suggested activation of NF- $\kappa$ B pathway genes: GSEA of differentially expressed genes for hallmark gene sets (a) and the HALLMARK\_TNFA\_SIGNALING\_VIA\_NFKB gene set (genes regulated by NF $\kappa$ B induced by TNF $\alpha$ ) (b) in PT\_VCAM1 compared with PT. FDR false-discovery rate  $q$  value. NES normalized enrichment score. The pre-ranked gene list was analyzed and statistics were determined with GSEA v4.0.3 (Broad Institute).**

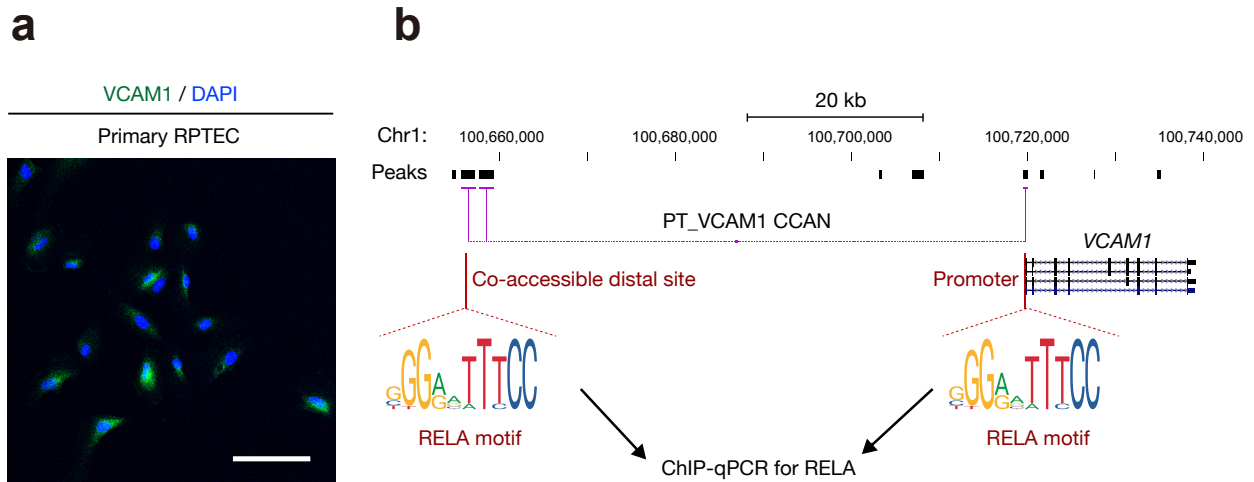

**Supplementary Figure 17 – ChIP-qPCR for RELA was performed for the DAR on *VCAM1* locus in RPTEC: (a)** Representative immunostaining images of VCAM1 (green) in the RPTEC. Scale bar indicates 100  $\mu$ m. Two independent experiments were performed, and similar results were obtained. **(b)** Graphical experimental methodology for ChIP-qPCR analysis of RELA binding within the promoter or an open chromatin region that was predicted to interact with *VCAM1* promoter via a CCAN.

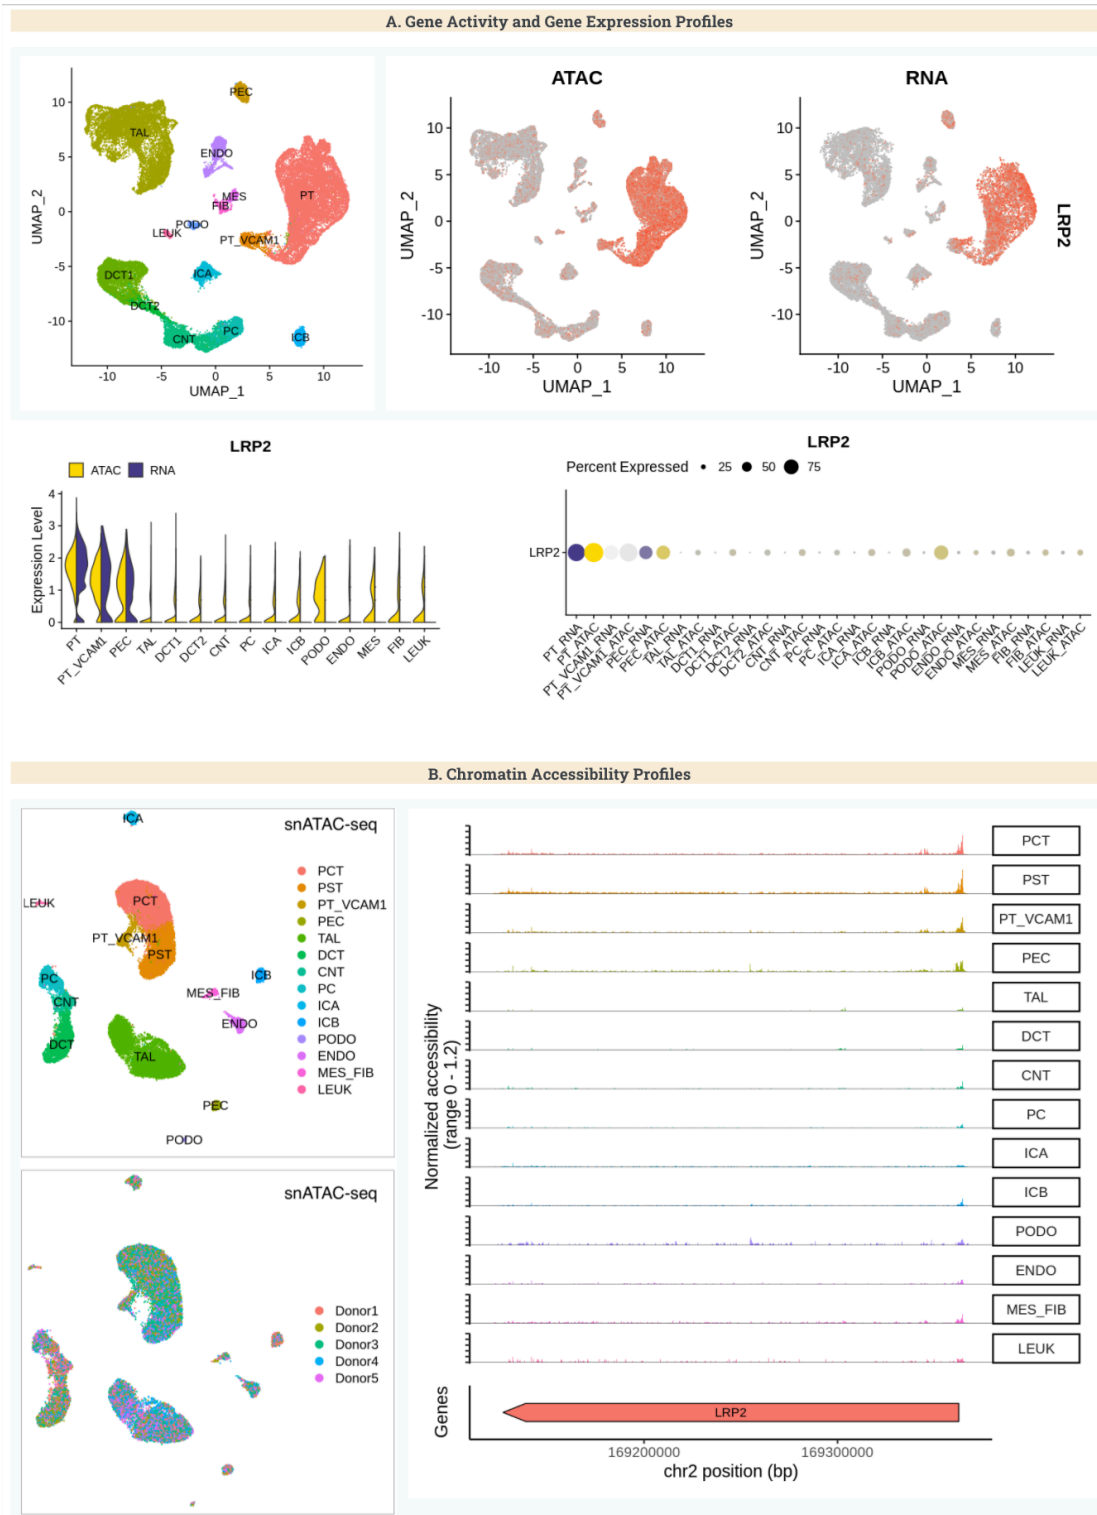

**Supplementary Figure 18 – Online analyzer for the harmonized multimodal kidney cell atlas encompassing both transcriptomic and epigenomic data:** Cell type-specific differentially expressed genes, chromatin accessibilities, gene activities and predicted transcription factor motif activities are searchable on the webpage (<http://humphreyslab.com/SingleCell/>).

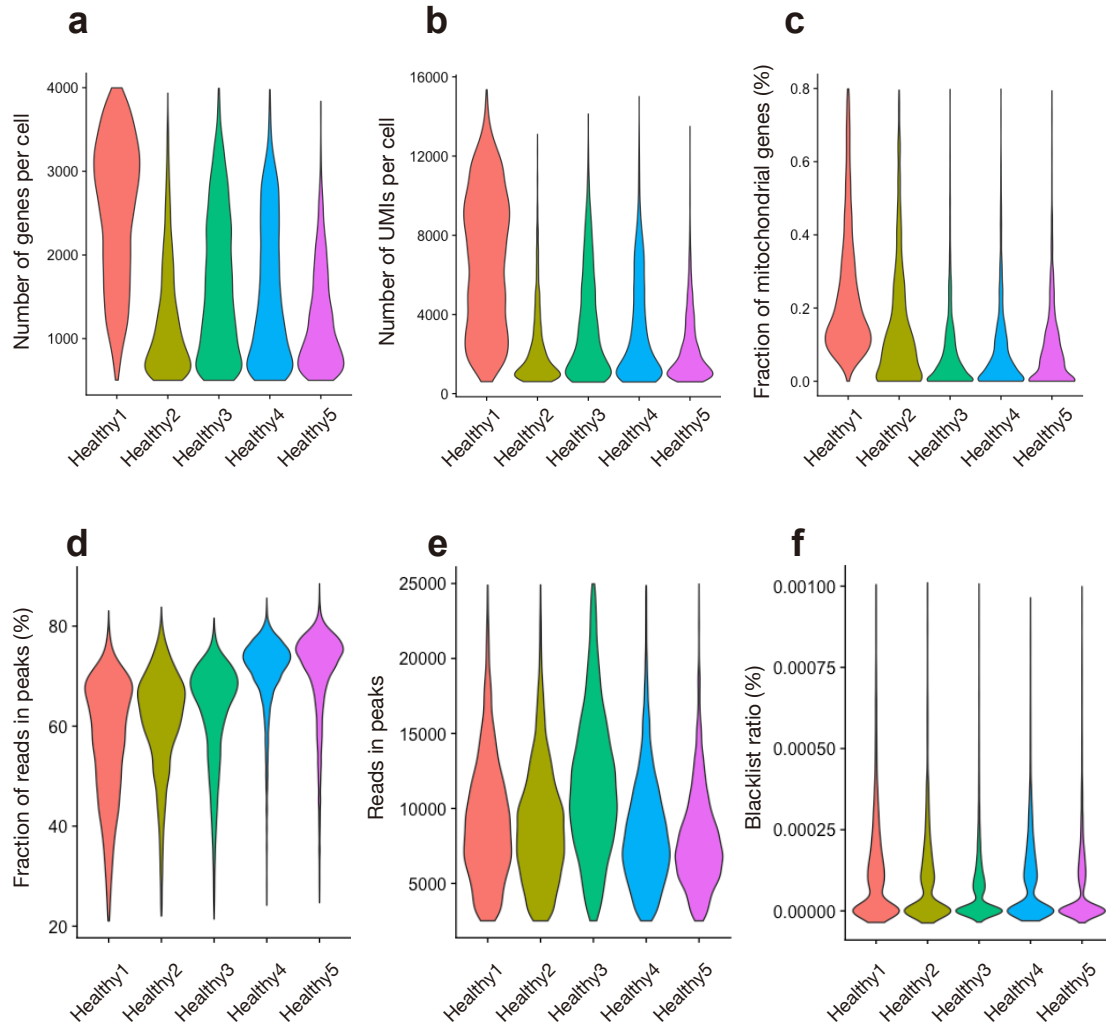

**Supplementary Figure 19 – QC metrics for snRNA-seq or snATAC-seq dataset:** (a) Number of genes per cell, (b) number of UMIs per cell and (c) fraction of mitochondrial genes per cell in snRNA-seq data were shown. (d) Fraction of reads in peaks, (e) number of reads in peaks per cell and (f) ratio of reads in genomic blacklist region per cell in snATAC-seq data were shown.

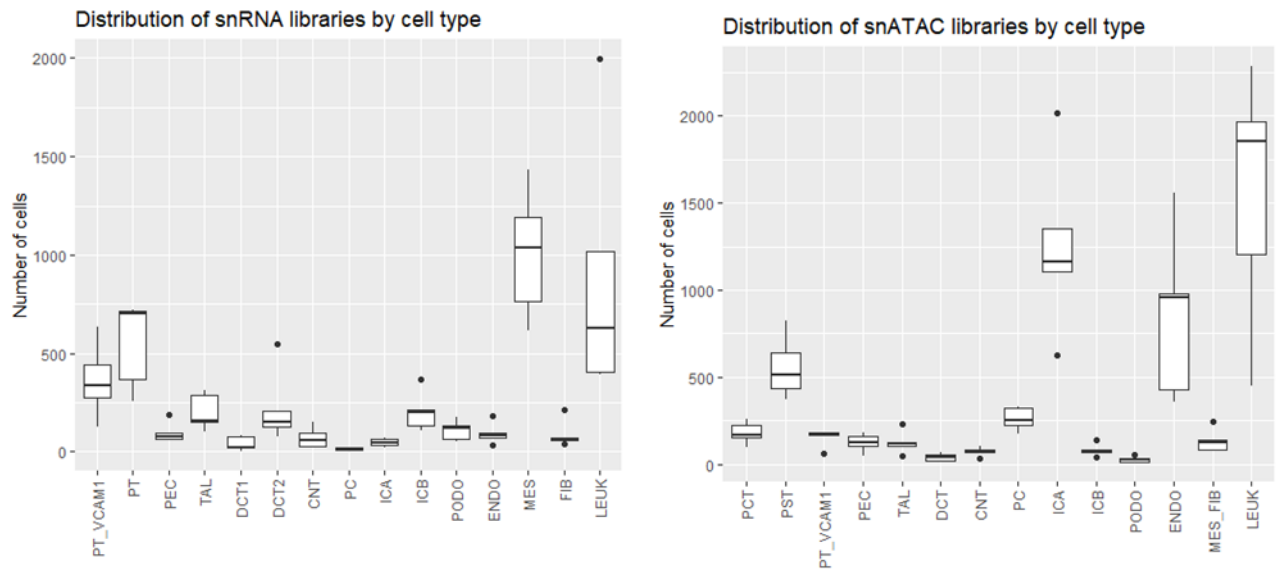

**Supplementary Figure 20 – The number or frequency of cells for each cell type quantitated in the filtered snRNA-seq or snATAC-seq dataset** – The number or frequency of cells for each cell type quantitated in the filtered snRNA-seq (left) or snATAC-seq dataset (right). PT-proximal tubule, PT\_VCAM1-proximal tubule, VCAM1+, PEC-parietal epithelial cells, TAL-thick ascending limb, DCT1-distal convoluted tubule segment 1, DCT2-distal convoluted tubule segment 2, CNT-connecting tubule, PC-principal cells, ICA-intercalated cells type A, ICB-intercalated cells type B, PODO-podocytes, ENDO-endothelial cells, MES-mesangial cells, FIB-fibroblasts, LEUK-leukocytes. The cell type proportions across individuals are also shown as dots. Box-and-whisker plots depict the median, quartiles and range.

| Supplementary Table 1 – Patient Demographics, Laboratory Data, and Renal Pathology |     |      |     |                                      |                |                    |       |          |  |
|------------------------------------------------------------------------------------|-----|------|-----|--------------------------------------|----------------|--------------------|-------|----------|--|
| ID                                                                                 | Age | Race | Sex | eGFR<br>(ml/min/1.73m <sup>2</sup> ) | sCr<br>(mg/dL) | Glomerulosclerosis | IFTA  | ANS      |  |
| Healthy 1                                                                          | 54  | NHW  | M   | 58                                   | 1.28           | None, < 10%        | 1-10% | Mild     |  |
| Healthy 2                                                                          | 62  | HIS  | M   | 61                                   | 1.21           | None, < 10%        | 1-10% | Moderate |  |
| Healthy 3                                                                          | 61  | NHW  | F   | 69                                   | 0.89           | None, < 10%        | 1-10% | Mild     |  |
| Healthy 4                                                                          | 50  | NHW  | M   | 78                                   | 1.10           | None, < 10%        | 1-10% | Moderate |  |
| Healthy 5                                                                          | 52  | NHW  | F   | 98                                   | 0.89           | None, < 10%        | 1-10% | Mild     |  |

**Supplementary Table 1 – Patient demographics and clinical information abstracted from the medical record:** Histologic review was performed by a renal pathologist. NHW-non-hispanic white, HIS-hispanic or latino, IFTA-interstitial fibrosis and tubular atrophy, ANS-arterial and arteriolar nephrosclerosis.

| Supplementary Table 2<br>Filtered snRNA-seq Dataset |              |             |
|-----------------------------------------------------|--------------|-------------|
| Cell Identity                                       | Number       | Frequency   |
| PT                                                  | 5036         | 25.2%       |
| PT_VCAM1                                            | 449          | 2.2%        |
| PEC                                                 | 552          | 2.8%        |
| TAL                                                 | 4435         | 22.2%       |
| DCT1                                                | 2761         | 13.8%       |
| DCT2                                                | 489          | 2.4%        |
| CNT                                                 | 1805         | 9.0%        |
| PC                                                  | 1022         | 5.1%        |
| ICA                                                 | 1107         | 5.5%        |
| ICB                                                 | 349          | 1.7%        |
| PODO                                                | 463          | 2.3%        |
| ENDO                                                | 1008         | 5.0%        |
| MES                                                 | 239          | 1.2%        |
| FIB                                                 | 207          | 1.0%        |
| LEUK                                                | 63           | 0.3%        |
| <b>TOTAL</b>                                        | <b>19985</b> | <b>100%</b> |

**Supplementary Table 2 – The number or frequency of cells for each cell type quantitated in the filtered snRNA-seq dataset:** PT-proximal tubule, PT\_VCAM1-proximal tubule, VCAM1+, PEC-parietal epithelial cells, TAL-thick ascending limb, DCT1-distal convoluted tubule segment 1, DCT2-distal convoluted tubule segment 2, CNT-connecting tubule, PC-principal cells, ICA-intercalated cells type A, ICB-intercalated cells type B, PODO-podocytes, ENDO-endothelial cells, MES-mesangial cells, FIB-fibroblasts, LEUK-leukocytes. See also Supplementary Fig.20.

| Supplementary Table 3<br>Filtered snATAC-seq Dataset |              |             |
|------------------------------------------------------|--------------|-------------|
| Cell Identity                                        | Number       | Frequency   |
| PCT                                                  | 6268         | 23.2%       |
| PST                                                  | 4280         | 15.8%       |
| PT_VCAM1                                             | 674          | 2.5%        |
| PEC                                                  | 403          | 1.5%        |
| TAL                                                  | 7762         | 28.7%       |
| DCT                                                  | 2777         | 10.3%       |
| CNT                                                  | 898          | 3.3%        |
| PC                                                   | 1302         | 4.8%        |
| ICA                                                  | 611          | 2.3%        |
| ICB                                                  | 620          | 2.3%        |
| PODO                                                 | 135          | 0.5%        |
| ENDO                                                 | 759          | 2.8%        |
| MES_FIB                                              | 352          | 1.3%        |
| LEUK                                                 | 193          | 0.7%        |
| <b>TOTAL</b>                                         | <b>27034</b> | <b>100%</b> |

**Supplementary Table 3 – The number of cells or frequency for each cell type quantitated in the filtered snATAC-seq dataset:** PCT-proximal convoluted tubule, PST-proximal straight tubule, PT\_VCAM1-proximal tubule VCAM1+, PEC-parietal epithelial cells, TAL-thick ascending limb, DCT-distal convoluted tubule, CNT-connecting tubule, PC-principal cells, ICA-intercalated cells type A, ICB-intercalated cells type B, PODO-podocytes, ENDO-endothelial cells, MES\_FIB-mesangial cells and fibroblasts, LEUK-leukocytes. See also Supplementary Fig.20.



| Supplementary Table 4: Overlap between Cell-type-specific differentially expressed genes and accessible chromatin regions |        |              |                    |         |              |                    |
|---------------------------------------------------------------------------------------------------------------------------|--------|--------------|--------------------|---------|--------------|--------------------|
| snRNA_vs_snATAC                                                                                                           | # DEG  | DEG with DAR | Prop. DEG with DAR | # DAR   | DAR near DEG | Prop. DAR near DEG |
| PT_vs_PCT                                                                                                                 | 769    | 333          | 0.43               | 3055    | 618          | 0.20               |
| PT_vs_PST                                                                                                                 | 769    | 263          | 0.34               | 2273    | 439          | 0.19               |
| PT_VCAM1                                                                                                                  | 425    | 128          | 0.30               | 1315    | 201          | 0.15               |
| PEC                                                                                                                       | 627    | 190          | 0.30               | 1221    | 267          | 0.22               |
| TAL                                                                                                                       | 408    | 169          | 0.41               | 1704    | 262          | 0.15               |
| DCT1_vs_DCT                                                                                                               | 432    | 178          | 0.41               | 1401    | 277          | 0.20               |
| DCT2_vs_DCT                                                                                                               | 348    | 142          | 0.41               | 1401    | 230          | 0.16               |
| CNT                                                                                                                       | 442    | 123          | 0.28               | 1146    | 185          | 0.16               |
| PC                                                                                                                        | 523    | 169          | 0.32               | 1416    | 268          | 0.19               |
| ICA                                                                                                                       | 651    | 236          | 0.36               | 1427    | 379          | 0.27               |
| ICB                                                                                                                       | 648    | 251          | 0.39               | 1754    | 421          | 0.24               |
| PODO                                                                                                                      | 927    | 335          | 0.36               | 1712    | 526          | 0.31               |
| ENDO                                                                                                                      | 861    | 421          | 0.49               | 2781    | 699          | 0.25               |
| MES_vs_MES_FIB                                                                                                            | 774    | 167          | 0.22               | 1203    | 231          | 0.19               |
| FIB_vs_MES_FIB                                                                                                            | 741    | 179          | 0.24               | 1203    | 248          | 0.21               |
| LEUK                                                                                                                      | 846    | 396          | 0.47               | 3642    | 611          | 0.17               |
| min                                                                                                                       | 348    | 123          | 0.22               | 1146    | 185          | 0.15               |
| max                                                                                                                       | 927    | 421          | 0.49               | 3642    | 699          | 0.31               |
| mean                                                                                                                      | 636.94 | 230.00       | 0.36               | 1790.88 | 366.38       | 0.20               |
| stdev                                                                                                                     | 185.61 | 94.92        | 0.08               | 752.23  | 166.80       | 0.04               |

**Supplementary Table 4 – Overlap between cell-type-specific differentially expressed genes and accessible chromatin regions:** Cell-type-specific differentially expressed genes (DEG) were identified for each cell type in the snRNA-seq dataset using the Seurat FindAllMarkers function with a log-fold threshold of 0.25 for genes expressed in at least 20% of cells. Cell-type-specific differentially accessible chromatin regions (DAR) were identified for each cell type in the snATAC-seq dataset using the Signac FindAllMarkers function with a log-fold threshold of 0.25 for peaks present in at least 20% of cells. DAR were annotated with the closest gene in the Ensembl database. The annotated gene list was overlapped with DEG to determine the proportion of DEG with a nearby DAR (Prop. DEG with DAR) and the proportion of DAR with a nearby DEG (Prop. DAR near DEG).

| <b>Donor</b> | <b>Total RNA reads</b> | <b>RNA reads per cell</b> | <b>Total ATAC reads</b> | <b>ATAC fragments per cell</b> |
|--------------|------------------------|---------------------------|-------------------------|--------------------------------|
| Healthy_1    | 499801345              | 72383                     | 343687555               | 13892                          |
| Healthy_2    | 317710661              | 74844                     | 269154397               | 12611                          |
| Healthy_3    | 391611498              | 59344                     | 396525222               | 17493                          |
| Healthy_4    | 368420549              | 81944                     | 314024252               | 10567                          |
| Healthy_5    | 310322473              | 65915                     | 267097032               | 10168                          |
| mean         | 377573305.2            | 70886                     | 318097691.6             | 12946.2                        |
| stdev        | 76365483               | 8632                      | 54357209                | 2960                           |

**Supplementary Table 5 – The numbers of total reads and reads per nucleus in snRNA-seq and snATAC-seq data:** Total reads and reads percell in snRNA-seq and snATAC-seq data were shown.

| <b>Quality Control for snRNA libraries</b> |                              |                                          |
|--------------------------------------------|------------------------------|------------------------------------------|
| <b>Donor</b>                               | <b>Sequencing Saturation</b> | <b>Fraction reads with Valid Barcode</b> |
| Healthy_1                                  | 77.5                         | 89.6                                     |
| Healthy_2                                  | 83.4                         | 77.9                                     |
| Healthy_3                                  | 83                           | 92.5                                     |
| Healthy_4                                  | 82.6                         | 91.7                                     |
| Healthy_5                                  | 80.5                         | 89.7                                     |
| mean                                       | 81.4                         | 88.28                                    |
| stdev                                      | 2.4                          | 5.9                                      |

**Supplementary Table 6 – Quality control for snRNA-seq libraries:** The library complexity for the snRNA libraries was estimated with sequencing saturation for each donor. The fraction of read with a valid barcode in each donor.

| <b>Quality Control for snATAC libraries</b> |                              |                                          |
|---------------------------------------------|------------------------------|------------------------------------------|
| <b>Donor</b>                                | <b>Sequencing Saturation</b> | <b>Fraction reads with Valid Barcode</b> |
| Healthy_1                                   | 36.2                         | 98.3                                     |
| Healthy_2                                   | 35.1                         | 98.3                                     |
| Healthy_3                                   | 37.1                         | 98.3                                     |
| Healthy_4                                   | 41.1                         | 95.8                                     |
| Healthy_5                                   | 37.3                         | 95.8                                     |
| mean                                        | 37.36                        | 97.3                                     |
| stdev                                       | 2.2                          | 1.3                                      |

**Supplementary Table 7 – Quality control for snATAC-seq libraries:** The sequencing saturation and the fraction of reads with a valid barcode in each donor were shown.
